# Supplementary material for: Enhanced specificity mutations perturb allosteric signaling in CRISPR-Cas9
Source: eLife. 2021 Dec 15;10:e73601. doi: 10.7554/eLife.73601 (PMC8741213; doi:10.7554/eLife.73601)
Supplement: Supplementary file 1. [file elife-73601-supp1.xlsx]

## Sheet: Sheet1
		file 1a					file 1b					file 1c
		K810A					K848A					K855A
		Residue	R2 (s-1)	kex (s-1)	papbDwN (s-1)		Residue	R2 (s-1)	kex (s-1)	papbDwN (s-1)		Residue	R2 (s-1)	kex (s-1)	papbDwN (s-1)
		782	19.8 ± 0.71	1049 ± 202	43.9 ± 3.6		779	27.9 ± 1.20	1912 ± 339	50.5 ± 4.8		782	18.6 ± 0.18	800 ± 121	21.1 ± 2.5
		789	20.4 ± 0.50	2137 ± 555	49.0 ± 2.9		782	20.8 ± 0.45	1317 ± 450	10.3 ± 1.4		783	18.2 ± 0.15	1725 ± 633	3.26 ± 0.41
		790	20.5 ± 0.67	983 ± 166	2.10 ± 0.22		783	25.2 ± 0.26	1421 ± 617	4.8 ± 0.29		784	19.2 ± 0.59	2281 ± 529	31.3 ± 2.0
		791	19.8 ± 0.59	863 ± 304	53.7 ± 6.4		785	25.9 ± 1.00	2424 ± 425	1.8 ± 0.17		789	18.3 ± 0.73	801 ± 221	14.63 ± 1.2
		793	18.6 ± 0.75	816 ± 92	22.3 ± 3.0		786	17.0 ± 0.86	1692 ± 330	32.7 ± 2.4		791	10.0 ± 0.24	2116 ± 318	2.27 ± 0.33
		796	21.3 ± 1.02	1174 ± 146	20.2 ± 1.9		789	25.6 ± 0.94	1129 ± 325	12.2 ± 0.96		793	16.7 ± 0.76	716 ± 586	12.5 ± 0.84
		799	17.6 ± 0.40	1239 ± 109	5.91 ± 0.62		791	15.8 ± 0.70	2454 ± 450	13.0 ± 1.5		796	18.8 ± 0.45	1217 ± 631	19.0 ± 1.5
		801	18.1 ± 0.47	1082 ± 225	12.5 ± 1.9		793	15.8 ± 0.43	2366 ± 633	9.71 ± 0.80		799	16.0 ± 0.66	2865 ± 340	7.69 ± 0.67
		805	20.2 ± 0.66	2581 ± 317	5.99 ± 0.93		795	20.1 ± 0.90	2448 ± 337	5.37 ± 0.59		806	19.4 ± 0.79	2758 ± 624	4.72 ± 0.40
		809	20.1 ± 0.90	2109 ± 391	14.2 ± 0.77		797	24.7 ± 0.51	1022 ± 383	9.26 ± 1.3		810	16.8 ± 0.47	1605 ± 195	32.5 ± 2.3
		811	20.2 ± 0.13	2501 ± 312	5.89 ± 0.39		799	21.9 ± 0.92	2528 ± 742	8.03 ± 0.74		811	18.2 ± 0.62	2096 ± 536	37.2 ± 2.8
		816	21.9 ± 0.62	1065 ± 151	1.89 ± 0.11		801	22.4 ± 0.36	1369 ± 488	8.12 ± 0.91		813	22.3 ± 0.61	2102 ± 733	32.4 ± 3.6
		818	21.3 ± 0.17	1586 ± 457	26.5 ± 2.0		808	23.9 ± 0.11	503 ± 124	3.89 ± 0.30		815	19.0 ± 0.54	1382 ± 576	3.02 ± 0.21
		820	19.4 ± 0.50	888 ± 359	26.9 ± 1.7		810	23.4 ± 0.73	1306 ± 145	20.7 ± 1.7		816	19.5 ± 0.56	1130 ± 118	22.5 ± 1.7
		821	21.9 ± 0.81	1220 ± 103	20.7 ± 2.5		811	26.8 ± 0.98	2010 ± 347	9.04 ± 0.88		817	18.3 ± 0.29	2386 ± 354	27.3 ± 2.8
		827	20.7 ± 0.53	1328 ± 600	2.22 ± 0.84		816	26.0 ± 0.91	2193 ± 631	10.9 ± 2.0		818	18.9 ± 0.81	1899 ± 474	7.95 ± 0.81
		828	31.6 ± 1.10	1556 ± 241	63.5 ± 4.7		817	28.2 ± 0.86	1641 ± 159	2.64 ± 0.36		820	17.7 ± 0.15	2984 ± 218	2.86 ± 0.30
		838	25.0 ± 0.84	2055 ± 323	12.6 ± 1.1		818	26.9 ± 0.14	536 ± 102	1.27 ± 0.11		821	22.7 ± 0.74	681 ± 290	1.05 ± 0.17
		846	19.6 ± 0.27	1337 ± 570	5.48 ± 0.61		821	23.5 ± 0.83	1927 ± 503	15.0 ± 1.2		827	19.1 ± 0.47	1369 ± 771	3.47 ± 0.48
		855	20.8 ± 0.19	1941 ± 327	13.1 ± 0.94		838	23.8 ± 0.68	2972 ± 280	36.5 ± 3.7		828	19.2 ± 0.38	1389 ± 524	32.5 ± 3.7
		873	25.5 ± 0.95	1572 ± 384	4.60 ± 0.90		846	26.0 ± 1.09	2069 ± 151	9.86 ± 1.2		838	22.5 ± 0.42	1414 ± 578	34.6 ± 4.0
		891	21.6 ± 0.60	1115 ± 530	6.39 ± 1.3		851	26.7 ± 0.37	1783 ± 507	20.3 ± 1.8		841	8.9 ± 0.58	2377 ± 981	13.8 ± 1.5
		892	19.6 ± 0.78	2076 ± 149	11.4 ± 1.5		853	23.1 ± 0.16	768 ± 440	26.9 ± 2.5		846	19.0 ± 0.61	1077 ± 116	5.70 ± 0.44
		893	20.8 ± 1.00	1554 ± 188	46.7 ± 3.8		873	32.0 ± 0.21	1429 ± 237	2.34 ± 0.63		853	18.2 ± 0.27	809 ± 362	13.8 ± 1.9
		894	20.7 ± 0.49	1328 ± 390	56.4 ± 6.9		877	25.3 ± 0.60	675 ± 169	2.29 ± 0.27		873	23.8 ± 0.88	925 ± 607	4.39 ± 0.59
		896	18.3 ± 0.58	1299 ± 133	11.3 ± 1.0		886	27.7 ± 0.22	801 ± 341	14.7 ± 0.99		881	18.1 ± 0.43	2612 ± 690	9.83 ± 1.1
		899	22.3 ± 0.50	703 ± 72	21.5 ± 2.7		891	24.9 ± 0.75	1471 ± 386	8.73 ± 0.91		886	19.5 ± 0.10	1535 ± 170	14.1 ± 0.97
		900	23.1 ± 0.38	1886 ± 329	22.7 ± 3.3		892	23.8 ± 0.31	912 ± 163	2.27 ± 0.14		888	18.3 ± 0.41	1131 ± 283	16.9 ± 1.4
		903	21.0 ± 0.22	1537 ± 353	2.45 ± 0.46		894	27.2 ± 0.64	2456 ± 1030	9.35 ± 0.87		892	17.3 ± 0.60	2314 ± 267	26.5 ± 2.2
		904	19.8 ± 0.39	1299 ± 204	38.3 ± 1.9		896	21.7 ± 0.16	1236 ± 136	23.2 ± 1.9		893	18.3 ± 0.74	866 ± 190	11.4 ± 0.80
		905	19.4 ± 0.20	2400 ± 587	19.3 ± 0.85		897	28.8 ± 0.44	1822 ± 139	7.75 ± 0.80		894	27.2 ± 0.49	1227 ± 174	1.66 ± 0.36
							900	28.0 ± 0.13	2319 ± 162	18.7 ± 1.6		900	19.8 ± 0.80	701 ± 111	24.6 ± 2.7
							903	47.6 ± 1.78	2225 ± 479	4.39 ± 0.55		904	18.3 ± 0.39	918 ± 107	12.1 ± 1.3
							904	23.1 ± 0.17	768 ± 272	4.91 ± 0.50		905	19.5 ± 0.11	1536 ± 496	18.8 ± 1.5
